# Supplementary material
Source: PubMed Central journal article supplement (PMC5516963)
Supplement: NIHMS872293-supplement-Change_of_Authorship_Form.pdf [file NIHMS872293-supplement-Change_of_Authorship_Form.pdf]

## Change of Authorship Form

(Must be completed and signed by ALL authors)

Please check all that apply

New author(s) have been added (in addition to this form, all new authors must complete the copyright transfer agreement and conflict of interest disclosure.

Change in order of authorship.

\_\_\_\_\_ An author wishes to remove his/her name. An author's name may only be removed his/her own request and a letter signed by the author should accompany this form

Manuscript Number STROKE/2017/017284R1

Manuscript Title MicroRNA-15a/16-1 antagomir ameliorates ischemic brain injury in experimental stroke

### Former Authorship

Please list ALL AUTHORS in the same order as the original submission. For more than 12, use an extra sheet.

#### Print Name

Name (1) Xinxin Yang  
 Name (2) Xuelian Tang  
 Name (3) Yejie Shi  
 Name (4) Kai Liu  
 Name (5) Sulaiman H. Hassan  
 Name (6) Anne Stetler

#### Print Name

Name (7) Jun Chen  
 Name (8) Ke-Jie Yin  
 Name (9) \_\_\_\_\_  
 Name (10) \_\_\_\_\_  
 Name (11) \_\_\_\_\_  
 Name (12) \_\_\_\_\_

### New Authorship

All authors must sign below agreeing to the changes in authorship. The authorship order must reflect the authorship order of the manuscript.

|                                    |                                     |                        |
|------------------------------------|-------------------------------------|------------------------|
| Name (1) <u>Xinxin Yang</u>        | Signature <u>Xinxin Yang</u>        | Date <u>4/26/2017</u>  |
| Name (2) <u>Xuelian Tang</u>       | Signature <u>Xuelian Tang</u>       | Date <u>04/25/2017</u> |
| Name (3) <u>Ping Sun</u>           | Signature <u>Ping Sun</u>           | Date <u>04/25/2017</u> |
| Name (4) <u>Yejie Shi</u>          | Signature <u>Yejie Shi</u>          | Date <u>4/26/17</u>    |
| Name (5) <u>Kai Liu</u>            | Signature <u>Kai Liu</u>            | Date <u>04/25/2017</u> |
| Name (6) <u>Sulaiman H. Hassan</u> | Signature <u>Sulaiman H. Hassan</u> | Date <u>4/26/2017</u>  |
| Name (7) <u>Anne Stetler</u>       | Signature <u>Anne Stetler</u>       | Date <u>4/25/2017</u>  |
| Name (8) <u>Jun Chen</u>           | Signature <u>Jun Chen</u>           | Date <u>04/25/17</u>   |
| Name (9) <u>Ke-Jie Yin</u>         | Signature <u>Ke-Jie Yin</u>         | Date <u>04/25/17</u>   |
| Name (10) _____                    | Signature _____                     | Date _____             |
| Name (11) _____                    | Signature _____                     | Date _____             |
| Name (12) _____                    | Signature _____                     | Date _____             |

Please scan and email to [stroke@strokeahajournal.org](mailto:stroke@strokeahajournal.org).
