# Supplementary material
Source: PubMed Central journal article supplement (PMC5516963)
Supplement: NIHMS872293-supplement-Visual_Abstract.pdf [file NIHMS872293-supplement-Visual_Abstract.pdf]

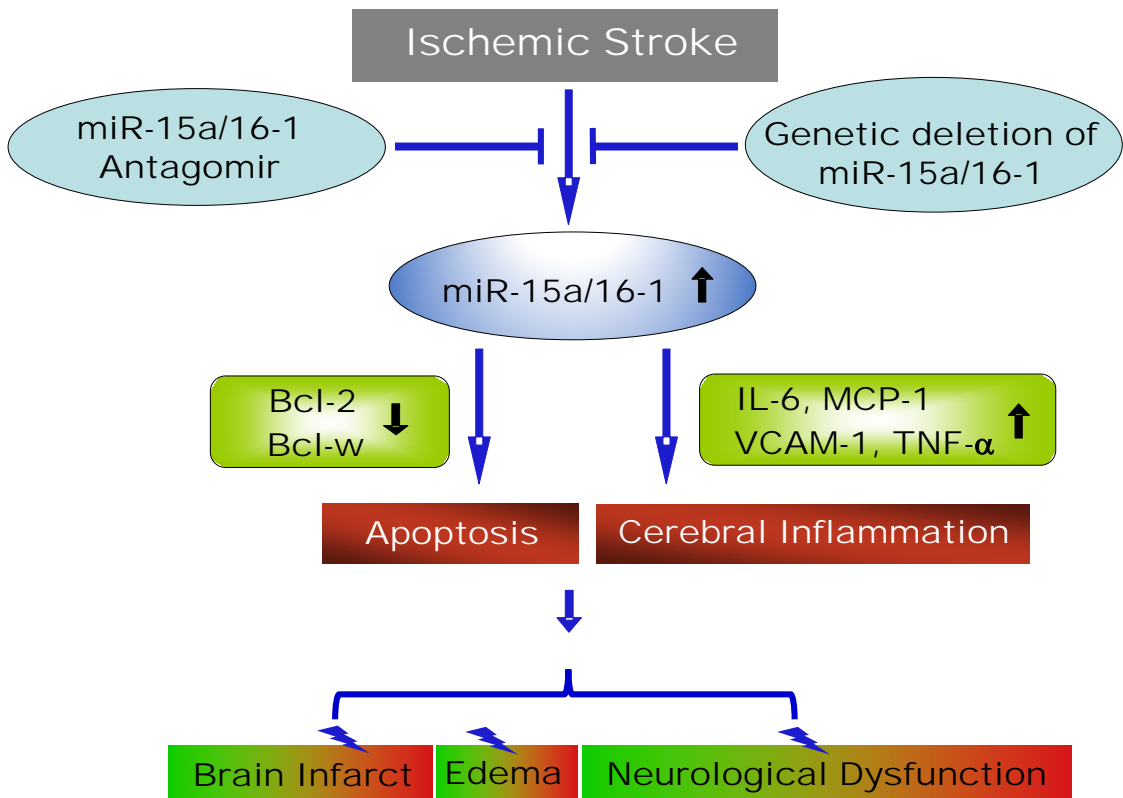

**Schematic representation of miR-15a/16-1 inhibition on ischemic brain injury and neurological outcomes.** In mouse brain, ischemic stroke induces brain levels of the miR-15a/16-1 cluster, resulting in brain infarction, edema and functional disorders via both suppression of anti-apoptotic proteins and upregulation of pro-inflammatory molecules. These post-stroke pathological changes are effectively reduced by pharmacological inhibition or genetic deletion of the miR-15a/16-1 cluster in mice.
